# Supplementary material
Source: PubMed Central journal article supplement (PMC6945745)
Supplement: NIHMS1063967-supplement-Supp_Fig_1.pdf [file NIHMS1063967-supplement-Supp_Fig_1.pdf]

### SUPPLEMENTAL FIGURE 1: Sample preparation steps

| <b>Sample Preparation Flowchart</b>                                                                                                                                                                                                                                                                                                                                                        |  |
|--------------------------------------------------------------------------------------------------------------------------------------------------------------------------------------------------------------------------------------------------------------------------------------------------------------------------------------------------------------------------------------------|--|
| Add 50 $\mu$ L of internal standard (IS) solution to polypropylene microcentrifuge vials                                                                                                                                                                                                                                                                                                   |  |
| ↓                                                                                                                                                                                                                                                                                                                                                                                          |  |
| Add 25 $\mu$ L sample (serum, calibrator, or blank) to microcentrifuge vials                                                                                                                                                                                                                                                                                                               |  |
| ↓                                                                                                                                                                                                                                                                                                                                                                                          |  |
| Add 125 $\mu$ L acetonitrile extraction solvent to each non-calibrator vial to precipitate proteins (extraction solvent not needed for calibrators)                                                                                                                                                                                                                                        |  |
| ↓                                                                                                                                                                                                                                                                                                                                                                                          |  |
| Vortex each microcentrifuge vial for ~10 seconds mechanically or ~30 seconds manually                                                                                                                                                                                                                                                                                                      |  |
| ↓                                                                                                                                                                                                                                                                                                                                                                                          |  |
| Allow the solutions to separate gravimetrically for at least 5 minutes or by centrifugation for 3 min at RCF of $212 \times g$ (microcentrifuge at 1500 RPM using a rotor with 84 mm radius)                                                                                                                                                                                               |  |
| ↓                                                                                                                                                                                                                                                                                                                                                                                          |  |
| Transfer 50 to 75 $\mu$ L of supernatant to HPLC vials                                                                                                                                                                                                                                                                                                                                     |  |
| ↓                                                                                                                                                                                                                                                                                                                                                                                          |  |
| Load each HPLC vial into a slightly cooled HPLC sample compartment (20°C)                                                                                                                                                                                                                                                                                                                  |  |
| ↓                                                                                                                                                                                                                                                                                                                                                                                          |  |
| Analyze by HPLC-UV using isocratic separation at 325 nm<br>Mobile Phase: 83% acetonitrile with 0.1% triethylamine:17% water<br>Isocratic Flow Rate: 1.1 mL/min<br>HPLC Column: C18 column at ambient temperature<br>Injection Volume: 15 $\mu$ L<br>Run Time (approximate): 7 minutes/injection<br>Peak Elution Times (approximate): 4.1 minutes (retinol) & 6.3 minutes (retinyl acetate) |  |
