# Supplementary material
Source: PubMed Central journal article supplement (PMC6945745)

**SUPPLEMENTAL FIGURE 2:** Column replacement is suggested when peak separation or peak quality declines. Chromatograms on a C12 column for the same serum sample (~65 µg/dL) showing acceptable peak separation (top), declining peak separation (middle), and both poor peak quality and poor separation (bottom).

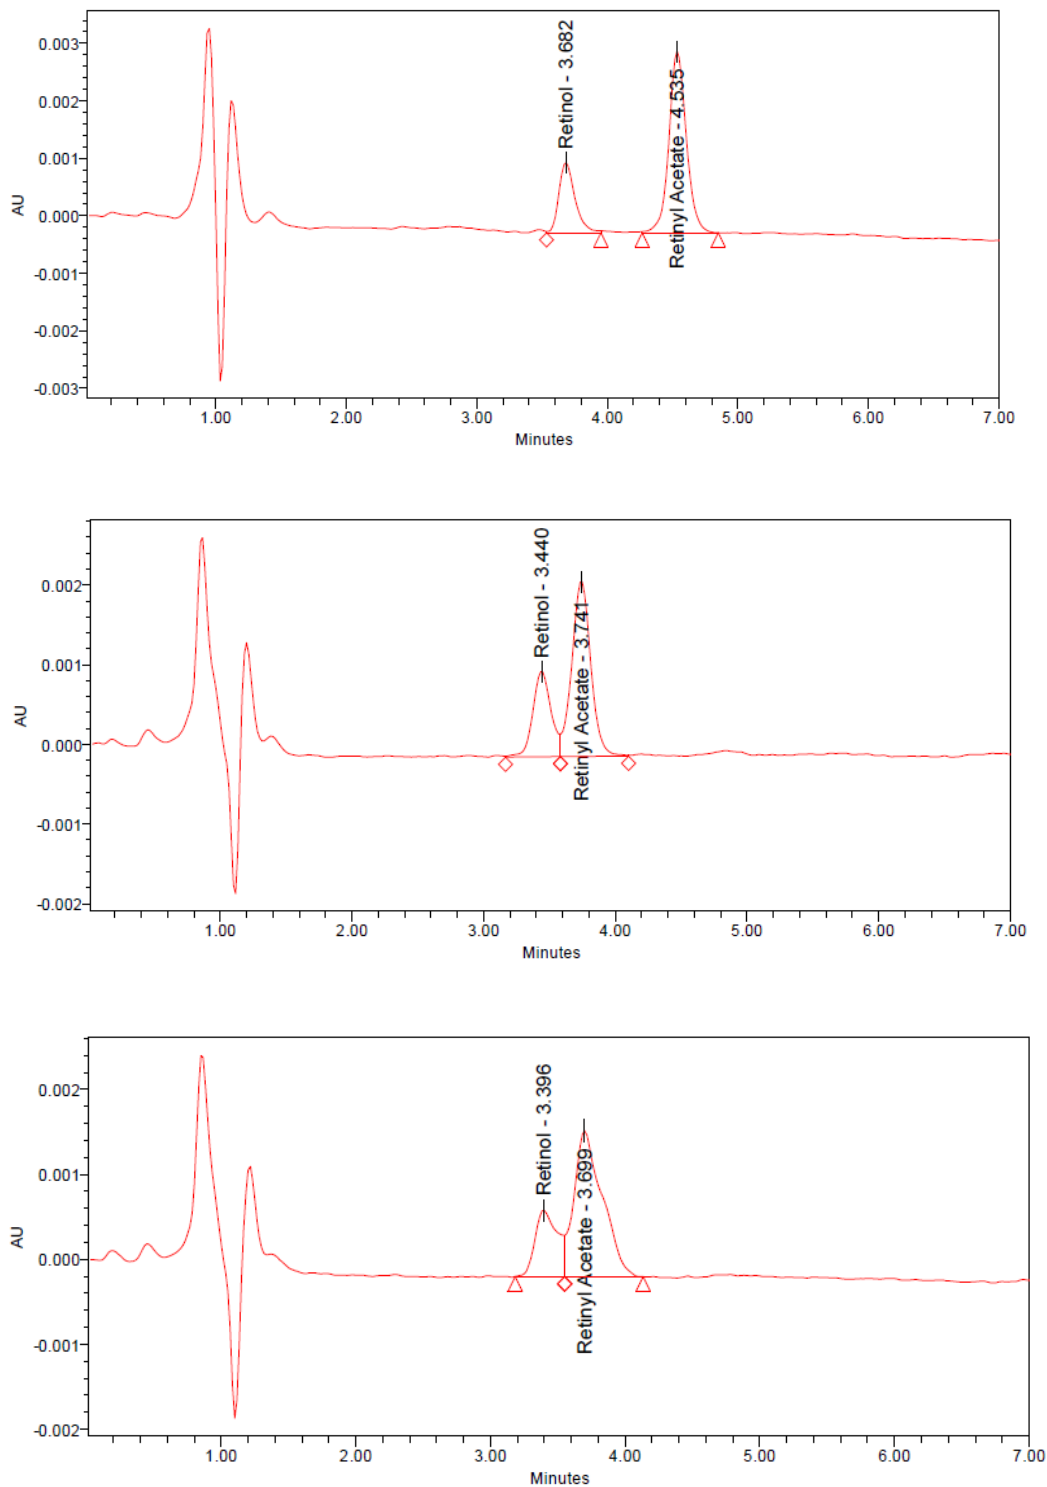

Supplement: NIHMS1063967-supplement-Supp_Fig_2.pdf [file NIHMS1063967-supplement-Supp_Fig_2.pdf]
